# Supplementary material for: Development of the Theta Comparative Cell Scoring Method to Quantify Diverse Phenotypic Responses Between Distinct Cell Types
Source: PubMed Central journal article supplement (PMC5015429; doi:10.1089/adt.2016.730), 2016-09-01
Supplement: Supp_Fig1.pdf [file Supp_Fig1.pdf]

## SUPPLEMENTARY DATA

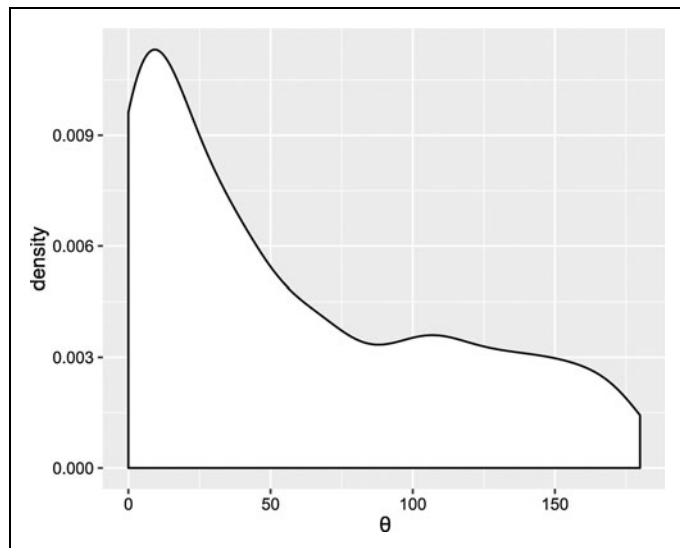

**Supplementary Fig. S1.** Density of theta differences between pairs of cell lines. A density plot of theta values from *Figure 4*, indicating most cell lines responded very similar to one another when treated with the same compounds, demonstrated by the abundance of low theta values.
