# Supplementary material for: Development of the Theta Comparative Cell Scoring Method to Quantify Diverse Phenotypic Responses Between Distinct Cell Types
Source: PubMed Central journal article supplement (PMC5015429; doi:10.1089/adt.2016.730), 2016-09-01
Supplement: Supp_Fig2.pdf [file Supp_Fig2.pdf]

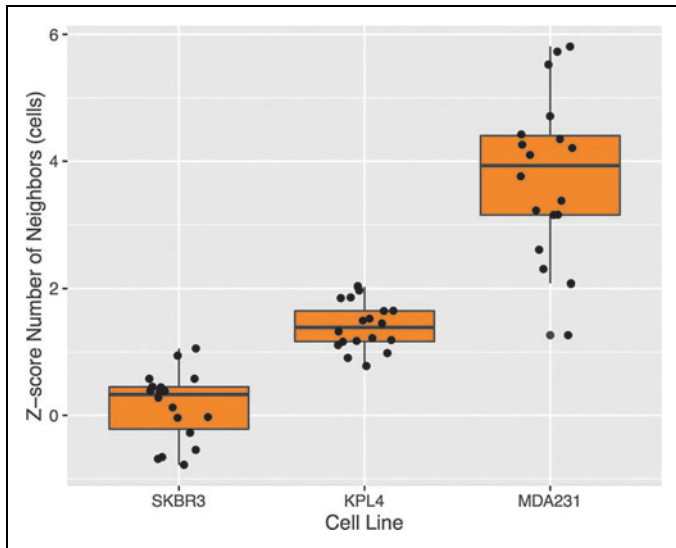

**Supplementary Fig. S2.** Box plot of number of cell neighbors. Z-scored values of number of cell neighbors for Saracatinib-treated cells, demonstrating the increased cell-cell contact in MDA-MB-231 cells compared to KPL4 and SKBR3 cell lines.
